# Supplementary material
Source: PubMed Central journal article supplement (PMC4355192)

## Supplementary Material

Multi-ethnic analysis reveals soluble L-selectin may be post-transcriptionally regulated by 3'UTR polymorphism: the Multi-Ethnic Study of Atherosclerosis (MESA)

*Human Genetics*

Cecilia Berardi, Nicholas B. Larson, Paul A. Decker, Christina L. Wassel, Phillip S. Kirsch, James S. Pankow, Michele M. Sale, Mariza de Andrade, Hugues Sicotte, Weihong Tang, Naomi Q. Hanson, Michael Y. Tsai, Yii-Der Ida Chen, Suzette J. Bielinski

Correspondence to Suzette J. Bielinski, PhD, Mayo Clinic, Department of Health Sciences Research, Division of Epidemiology, Harwick Building 6-56, 200 First Street SW, Rochester, MN 55905; Phone: (507) 538-4914; Fax: (507) 284-1516; e-mail: [bielinski.suzette@mayo.edu](mailto:bielinski.suzette@mayo.edu)

**Table S1** Population characteristics of the race/ethnicity stratified random sample

| Characteristics                            | Non-Hispanic whites | Chinese   | African   | Hispanic  | <i>p</i> value |
|--------------------------------------------|---------------------|-----------|-----------|-----------|----------------|
| N                                          | 620                 | 600       | 579       | 604       |                |
| Age, years                                 | 63±10               | 63±10     | 63±9.8    | 63±10     | 0.45           |
| Sex, % females                             | 52                  | 51        | 55        | 54        | 0.44           |
| Body mass index, kg/m <sup>2</sup>         | 28±5.3              | 24±3.3    | 30±5.7    | 30±5.2    | <0.001         |
| Total cholesterol, mg/dl                   | 19±37               | 190±31    | 189±36    | 196±36    | 0.007          |
| HDL cholesterol, mg/dl                     | 54±17               | 50±13     | 54±15     | 48±13     | <0.001         |
| LDL cholesterol, mg/dl                     | 115±34              | 112±28    | 115±33    | 116±31    | 0.18           |
| Triglycerides, mg/dl                       | 131±75              | 148±94    | 107±75    | 156±99    | <0.001         |
| Antilipidemic therapy, % yes               | 23                  | 19        | 20        | 20        | <0.001         |
| Diabetes mellitus, % yes                   | 9                   | 16        | 20        | 22        | <0.001         |
| Systolic blood pressure, mmHg              | 122 (19)            | 121 (20)  | 129 (22)  | 125 (21)  | <0.0001        |
| Diastolic blood pressure, mmHg             | 69 (9.5)            | 69 (9.7)  | 73 (10)   | 70 (10)   | <0.0001        |
| Hypertension, % yes                        | 37                  | 37        | 57        | 45        | <0.001         |
| Current smokers, % yes                     | 15                  | 6         | 17        | 11        | <0.001         |
| Current use of alcohol, % yes              | 70                  | 30        | 46        | 43        | <0.0001        |
| CAC > 0, % yes                             | 61                  | 52        | 46        | 53        | <0.001         |
| CAC categories, Agatston score             |                     |           |           |           | <0.0001        |
| < 50, n (%)                                | 349 (62%)           | 377 (67%) | 391 (75%) | 381 (69%) |                |
| 50-149, n (%)                              | 62 (11%)            | 76 (14%)  | 49 (9.3%) | 64 (12%)  |                |
| 150-399, n (%)                             | 68 (12%)            | 62 (11%)  | 36 (6.9%) | 47 (8.6%) |                |
| > 400, n (%)                               | 86 (15%)            | 45 (8.0%) | 49 (9.3%) | 56 (10%)  |                |
| Common carotid intima-medial thickness, mm | 0.71±0.21           | 0.68±0.19 | 0.75±0.21 | 0.69±0.19 | <0.001         |
| CHD events, n (%) thru 2012                | 42 (6.8)            | 22 (3.7)  | 26 (4.5)  | 41 (6.8)  | -              |
| L-selectin levels, mean (SD) ng/mL         | 956±215             | 834±174   | 867±192   | 904±195   | <0.001         |

CAC coronary artery disease, CHD coronary heart disease, HDL high-density lipoprotein, LDL low-density lipoprotein

**Table S2** Genetic variants associated with soluble L-selectin (ng/mL)

| SNP <sup>a</sup>         | Chr      | BP               | Ref/Alt    | MAF          | Gene               | Location     | Beta          | P-value <sup>b</sup> |
|--------------------------|----------|------------------|------------|--------------|--------------------|--------------|---------------|----------------------|
| <b>African American</b>  |          |                  |            |              |                    |              |               |                      |
| rs115231908              | 2        | 27792044         | A/C        | 0.030        | <i>LOC10042</i>    | 5'upstream   | 164.3         | 4.77E-07             |
| rs114539181              | 2        | 27759468         | A/G        | 0.027        | <i>GCKR</i>        | 3'downstream | 170.8         | 5.21E-07             |
| <b>rs12938</b>           | <b>1</b> | <b>169660781</b> | <b>T/C</b> | <b>0.319</b> | <b><i>SELL</i></b> | <b>3'UTR</b> | <b>-58.96</b> | <b>1.75E-06</b>      |
| rs10518889               | 15       | 70550428         | G/A        | 0.257        | <i>TLE3</i>        | 5'upstream   | 61.7          | 2.23E-06             |
| rs114747981              | 2        | 27739599         | A/C        | 0.026        | <i>GCKR</i>        | intron       | 157.7         | 3.76E-06             |
| rs228966                 | 22       | 37537514         | G/A        | 0.356        | <i>IL2RB</i>       | intron       | 56.82         | 4.00E-06             |
| rs116715409              | 2        | 27955673         | A/G        | 0.031        | <i>SLC4A1AP</i>    | 3'downstream | 149.4         | 4.98E-06             |
| rs3917768                | 1        | 169572947        | A/C        | 0.252        | <i>SELP</i>        | intron       | -58.04        | 5.32E-06             |
| rs116121798              | 2        | 27601439         | G/A        | 0.026        | <i>ZNF513</i>      | coding       | 157.8         | 5.35E-06             |
| rs114022285              | 2        | 27952587         | T/G        | 0.028        | <i>SLC4A1AP</i>    | 3'downstream | 154.5         | 5.94E-06             |
| <b>Chinese American</b>  |          |                  |            |              |                    |              |               |                      |
| <b>rs12938</b>           | <b>1</b> | <b>169660781</b> | <b>T/C</b> | <b>0.069</b> | <b><i>SELL</i></b> | <b>3'UTR</b> | <b>-102.5</b> | <b>1.09E-07</b>      |
| rs11632650               | 15       | 62475458         | T/C        | 0.008        | <i>C2CD4B</i>      | 5'upstream   | 230           | 3.12E-06             |
| rs12916500               | 15       | 62476884         | T/A        | 0.008        | <i>C2CD4B</i>      | 5'upstream   | 230           | 3.12E-06             |
| rs67049863               | 15       | 62472105         | T/C        | 0.008        | <i>C2CD4B</i>      | 5'upstream   | 230           | 3.12E-06             |
| rs7179570                | 15       | 62477197         | A/G        | 0.008        | <i>C2CD4B</i>      | 5'upstream   | 230           | 3.12E-06             |
| rs902790                 | 3        | 119886776        | A/T        | 0.098        | <i>GPR156</i>      | coding       | 76.46         | 7.62E-06             |
| rs9857123                | 3        | 119893063        | C/A        | 0.098        | <i>GPR156</i>      | intron       | 76.46         | 7.62E-06             |
| <b>European American</b> |          |                  |            |              |                    |              |               |                      |
| <b>rs12938</b>           | <b>1</b> | <b>169660781</b> | <b>T/C</b> | <b>0.285</b> | <b><i>SELL</i></b> | <b>3'UTR</b> | <b>-118.1</b> | <b>6.88E-20</b>      |
| rs1131498                | 1        | 169676486        | T/C        | 0.278        | <i>SELL</i>        | coding       | -105.7        | 2.14E-16             |
| rs621437                 | 1        | 169924759        | T/C        | 0.314        | <i>KIFAP3</i>      | intron       | -71.96        | 1.64E-08             |
| rs3917419                | 1        | 169699819        | C/T        | 0.433        | <i>SELE</i>        | intron       | -66.92        | 4.77E-08             |
| rs5353                   | 1        | 169702974        | T/C        | 0.262        | <i>SELE</i>        | intron       | 71.6          | 6.84E-08             |
| rs3917392                | 1        | 169704335        | A/G        | 0.120        | <i>SELE</i>        | 5'upstream   | 91.36         | 2.51E-07             |
| rs4987318                | 1        | 169671478        | C/A        | 0.261        | <i>SELL</i>        | intron       | 68.34         | 2.68E-07             |
| rs3917410                | 1        | 169701108        | T/C        | 0.122        | <i>SELE</i>        | intron       | 90.04         | 2.82E-07             |
| rs3917452                | 1        | 169703617        | G/T        | 0.120        | <i>SELE</i>        | 5'upstream   | 90.82         | 2.86E-07             |
| rs3917731                | 1        | 169580717        | A/G        | 0.284        | <i>SELP</i>        | intron       | -68.8         | 2.95E-07             |
| rs5361                   | 1        | 169701060        | A/C        | 0.118        | <i>SELE</i>        | coding       | 90.56         | 3.40E-07             |
| rs4656697                | 1        | 169679179        | G/C        | 0.267        | <i>SELL</i>        | intron       | 66.14         | 6.47E-07             |
| rs4987307                | 1        | 169674403        | C/A        | 0.121        | <i>SELL</i>        | intron       | 84.55         | 1.44E-06             |
| rs145194793              | 17       | 17250197         | G/A        | 0.005        | <i>NT5M</i>        | coding       | 381.2         | 1.53E-06             |
| rs7195004                | 16       | 19871546         | C/T        | 0.012        | <i>GPRC5B</i>      | 3'UTR        | 258           | 2.40E-06             |
| rs143440180              | 16       | 22328486         | C/T        | 0.013        | <i>POLR3E</i>      | coding       | 247.6         | 6.71E-06             |
| rs12140984               | 1        | 169887347        | C/T        | 0.098        | <i>KIFAP3</i>      | 3'downstream | 88.29         | 7.69E-06             |
| <b>Hispanic American</b> |          |                  |            |              |                    |              |               |                      |
| <b>rs12938</b>           | <b>1</b> | <b>169660781</b> | <b>T/C</b> | <b>0.212</b> | <b><i>SELL</i></b> | <b>3'UTR</b> | <b>-77.09</b> | <b>1.03E-08</b>      |
| rs621437                 | 1        | 169924759        | T/C        | 0.193        | <i>KIFAP3</i>      | intron       | -73.47        | 1.02E-07             |
| rs1131498                | 1        | 169676486        | T/C        | 0.176        | <i>SELL</i>        | coding       | -74.56        | 1.03E-07             |
| rs10445216               | 17       | 74018597         | T/C        | 0.011        | <i>EVPL</i>        | coding       | 237.6         | 6.60E-06             |
| rs11544990               | 17       | 73987590         | G/T        | 0.011        | <i>TEN1</i>        | coding       | 237.6         | 6.60E-06             |
| rs1541160                | 1        | 169995802        | A/G        | 0.170        | <i>KIFAP3</i>      | intron       | -65.59        | 7.36E-06             |
| rs1007294                | 21       | 35838907         | G/T        | 0.180        | <i>KCNE1</i>       | intron       | -65.09        | 7.61E-06             |

|            |    |          |     |       |              |        |       |          |
|------------|----|----------|-----|-------|--------------|--------|-------|----------|
| rs10048853 | 20 | 46292910 | C/T | 0.015 | <i>SULF2</i> | coding | 209.7 | 7.75E-06 |
|------------|----|----------|-----|-------|--------------|--------|-------|----------|

---

<sup>a</sup>SNPs occurring in the *SELL/SELP/SELE* region correspond to grayed rows; rs12938 results are bolded

<sup>b</sup>Fit using linear regression under an additive genetic model, adjusting for age, gender, and leading PCs

MAF: minor allele frequency; SNP: single nucleotide polymorphism; Ref/Alt: reference/alternate alleles

**Supplemental Figure 1** Study design

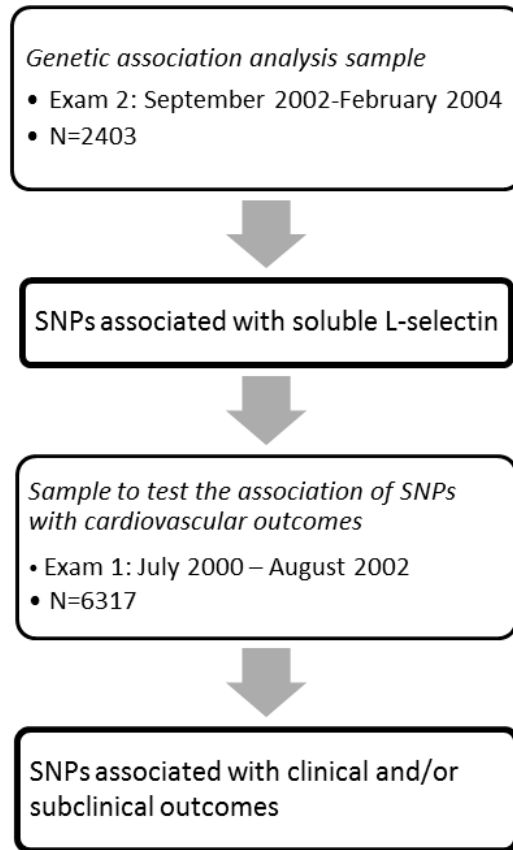

Supplement: NIHMS654495-supplement-439_2014_1527_MOESM1_ESM.pdf [file NIHMS654495-supplement-439_2014_1527_MOESM1_ESM.pdf]
